# Supplementary material for: Immune-mediated approaches against COVID-19
Source: Springer Nature journal article supplement (doi:10.1038/s41565-020-0732-3), 2020-07-13
Supplement: 41565_2020_732_MOESM1_ESM.pdf [file 41565_2020_732_MOESM1_ESM.pdf]

In the format provided by the authors and unedited.

# Immune-mediated approaches against COVID-19

Helena F. Florindo<sup>1</sup>  , Ron Kleiner<sup>2</sup>, Daniella Vaskovich-Koubi<sup>2</sup>, Rita C. Acúrcio<sup>1</sup>, Barbara Carreira<sup>1</sup>, Eilam Yeini<sup>2</sup>, Galia Tiram<sup>2</sup>, Yulia Liubomirski<sup>2</sup> and Ronit Satchi-Fainaro<sup>2,3</sup>  

---

<sup>1</sup>Research Institute for Medicines (iMed.Ulisboa), Faculty of Pharmacy, Universidade de Lisboa, Lisbon, Portugal. <sup>2</sup>Department of Physiology and Pharmacology, Sackler Faculty of Medicine, Tel Aviv University, Tel Aviv, Israel. <sup>3</sup>Sagol School of Neuroscience, Tel Aviv University, Tel Aviv, Israel.  
e-mail: [hflorindo@ff.ulisboa.pt](mailto:hflorindo@ff.ulisboa.pt); [ronitsf@tauex.tau.ac.il](mailto:ronitsf@tauex.tau.ac.il)

## Immune-mediated approaches against COVID-19

Helena F Florindo\*<sup>1</sup>, Ron Kleiner<sup>2</sup>, Daniella Vaskovich<sup>2</sup>, Rita C. Acúrcio<sup>1</sup>, Barbara Carreira<sup>1</sup>, Eilam Yeini<sup>2</sup>, Galia Tiram<sup>2</sup>, Yulia

Liubomirski<sup>2</sup>, Ronit Satchi-Fainaro\*<sup>2</sup>

### SUPPLEMENTARY TABLES

**Supplementary Table 1. Innate and adaptive immune responses to viral infections.**

|                        | COMPONENT                               | MAIN FUNCTION                                                                                                  | TARGET                                                                                                      | MAIN COMPONENT-TARGET RECOGNITION SITE                                                                                                                                | SIGNALLING PATHWAY TRANSDUCTION                                                                                                                                                                                                                                                                                                                                                                                                                                                                                                                                                                                                                                                      | IMMUNE EFFECT                                                                                                                                                                                                                                                    |
|------------------------|-----------------------------------------|----------------------------------------------------------------------------------------------------------------|-------------------------------------------------------------------------------------------------------------|-----------------------------------------------------------------------------------------------------------------------------------------------------------------------|--------------------------------------------------------------------------------------------------------------------------------------------------------------------------------------------------------------------------------------------------------------------------------------------------------------------------------------------------------------------------------------------------------------------------------------------------------------------------------------------------------------------------------------------------------------------------------------------------------------------------------------------------------------------------------------|------------------------------------------------------------------------------------------------------------------------------------------------------------------------------------------------------------------------------------------------------------------|
| INNATE IMMUNE RESPONSE | Toll-like receptors (TLR) <sup>1</sup>  | <ul style="list-style-type: none"> <li>Recognition of pathogen-associated molecular patterns (PAMP)</li> </ul> | <ul style="list-style-type: none"> <li>Viral lipids, lipoproteins, proteins, &amp; nucleic acids</li> </ul> | <ul style="list-style-type: none"> <li>Cell membrane- TLR-2 and TLR-4</li> <li>Cytoplasm- TLR-3, TLR-7/8</li> <li>Endosome, lysosome, and endocytolysosome</li> </ul> | <ul style="list-style-type: none"> <li>Activation of adapter proteins Toll/Interleukin-1 receptor (TIR) - mainly activates NF-κB<sup>2</sup> and mitogen-activated protein kinases (MAPK) pathways to induce inflammatory factors expression.</li> <li>Activation of adapter proteins TRIF (Activation of adapter proteins)- activates the transcription factors interferon-regulatory factor (IRF)3 and NF-κB)- activates the transcription factors IRF3 and NF-κB</li> <li>Type I interferon (IFN) activates the downstream Janus kinase/signal transducers and activators of transcription (JAK-STAT) signal pathway, promotes the expression of IFN-stimulated genes.</li> </ul> | <ul style="list-style-type: none"> <li>Induction of the expression of type I IFN, immune-inflammatory factors and the TRIF-dependent pathway, which activates the type I IFN and inflammatory factors.</li> <li>Promotion of macrophage phagocytosis.</li> </ul> |
|                        | RIG-I-like receptors (RLR) <sup>3</sup> | <ul style="list-style-type: none"> <li>Recognition of viral RNA</li> </ul>                                     | <ul style="list-style-type: none"> <li>Short double-stranded with a triphosphate</li> </ul>                 | <ul style="list-style-type: none"> <li>Cytoplasm</li> </ul>                                                                                                           | <ul style="list-style-type: none"> <li>Activation of caspase initiates the downstream signalling, detected by the</li> </ul>                                                                                                                                                                                                                                                                                                                                                                                                                                                                                                                                                         | <ul style="list-style-type: none"> <li>Induction of type 1 IFN and inflammatory</li> </ul>                                                                                                                                                                       |

|                                 |                                                                                       |                                                                                                                                                                           |                                                                                                                                                                                      |                                                                                                               |                                                                                                                                                                                                                                                                                                                                                                                                                                                                                               |                                                                                                                                                                                                                                                                                                                                                                                                                                                     |
|---------------------------------|---------------------------------------------------------------------------------------|---------------------------------------------------------------------------------------------------------------------------------------------------------------------------|--------------------------------------------------------------------------------------------------------------------------------------------------------------------------------------|---------------------------------------------------------------------------------------------------------------|-----------------------------------------------------------------------------------------------------------------------------------------------------------------------------------------------------------------------------------------------------------------------------------------------------------------------------------------------------------------------------------------------------------------------------------------------------------------------------------------------|-----------------------------------------------------------------------------------------------------------------------------------------------------------------------------------------------------------------------------------------------------------------------------------------------------------------------------------------------------------------------------------------------------------------------------------------------------|
|                                 |                                                                                       |                                                                                                                                                                           | structure and complementary ends and/or poly-U/UC-rich structure.                                                                                                                    |                                                                                                               | mitochondrial anti-viral signalling adaptor protein, present on the mitochondrial surface. Downstream signalling initiates the transcription of IFN $\alpha$ and $\beta$ .<br><ul style="list-style-type: none"> <li>• Activation of the transcription factors IRF3/7 and NF-kB<sup>4</sup></li> </ul>                                                                                                                                                                                        | cytokines to block viral replication.                                                                                                                                                                                                                                                                                                                                                                                                               |
|                                 | Nucleotide-binding and oligomerization Domain (NOD)-like receptors (NLR) <sup>5</sup> | <ul style="list-style-type: none"> <li>• Promotion of IRF3 translocation to the nuclei following endoplasmic reticulum (ER) stress caused by viral components.</li> </ul> | <ul style="list-style-type: none"> <li>• Mitochondrial antiviral - signalling protein (MAVS)</li> </ul>                                                                              | <ul style="list-style-type: none"> <li>• Cytoplasm</li> </ul>                                                 | <ul style="list-style-type: none"> <li>• Activation of adapter proteins TIRF - activates the transcription factors IRF3</li> </ul>                                                                                                                                                                                                                                                                                                                                                            | <ul style="list-style-type: none"> <li>• IFN <math>\alpha/\beta</math> transcription</li> </ul>                                                                                                                                                                                                                                                                                                                                                     |
|                                 | C-type lectin-like receptor (CLR) <sup>6</sup>                                        | <ul style="list-style-type: none"> <li>• Expressed on macrophages and dendritic cells (DC)</li> <li>• Recognition and capture of pathogens.</li> </ul>                    | <ul style="list-style-type: none"> <li>• Pathogen ligands</li> </ul>                                                                                                                 | <ul style="list-style-type: none"> <li>• Transmembrane receptor- extra cellular and intra cellular</li> </ul> | <ul style="list-style-type: none"> <li>• Pathogen internalization following CLR binding, and further degradation in the lysosome.</li> <li>• Recruitment of acidified spleen tyrosine kinases, which promotes CARD9, B cell lymphoid tissue 10 (BcL10), and mucosa-associated lymphoid tissue lymphoma translocation protein (Malt)1 complex formation</li> <li>• Activation of NF-kB and MAPK pathways</li> <li>• Signalling pathways</li> <li>• B cell activation by Th2 and Tfh</li> </ul> | <ul style="list-style-type: none"> <li>• Cell phagocytosis</li> <li>• DC maturation</li> <li>• CD4<sup>+</sup> T helper cells and like Th1, Th2, follicular T helper cells (Tfh).</li> <li>• Cytotoxic CD8<sup>+</sup> T cells</li> <li>• Cytokine secretion from macrophages and DC, such as IFN<math>\alpha</math>, IL-6, IL10, IL-12p40, IL-27, CCL17, CCL22, TNF<math>\alpha</math>, IL-1<math>\beta</math>, Type 1 IFN<sup>7</sup>.</li> </ul> |
|                                 | DC <sup>8</sup>                                                                       | <ul style="list-style-type: none"> <li>• Antigen presenting cells (APC) – present the viral antigen.</li> </ul>                                                           | <ul style="list-style-type: none"> <li>• Pathogens, Pathogen ligands and RNA</li> </ul>                                                                                              | <ul style="list-style-type: none"> <li>• Cell membrane</li> </ul>                                             | <ul style="list-style-type: none"> <li>• Stimulate the activation of T-lymphocytes (CD4<sup>+</sup> and CD8<sup>+</sup>) and B-lymphocytes.</li> <li>• Activation of NF-kB pathway</li> </ul>                                                                                                                                                                                                                                                                                                 | <ul style="list-style-type: none"> <li>• Cytokine secretion, IFN <math>\alpha/\beta</math> release</li> </ul>                                                                                                                                                                                                                                                                                                                                       |
| <b>ADAPTIVE IMMUNE RESPONSE</b> | T cells                                                                               | <ul style="list-style-type: none"> <li>• CD4<sup>+</sup> T cells - B cells activation and regulation</li> </ul>                                                           | <ul style="list-style-type: none"> <li>• CD4<sup>+</sup> T cells - B cells activation</li> <li>• CD8<sup>+</sup> T cells- viral infected cells, virus structural proteins</li> </ul> | <ul style="list-style-type: none"> <li>• Cell membrane</li> </ul>                                             | <ul style="list-style-type: none"> <li>• CD4<sup>+</sup> T cells - promote the production of virus-specific antibodies by activating T-dependent B cells. Produce</li> </ul>                                                                                                                                                                                                                                                                                                                  | <ul style="list-style-type: none"> <li>• IL-17- recruit monocytes and neutrophils to the inflammation site.</li> <li>• IL-1, IL-6, IL-8, IL-21, TNF-<math>\beta</math>, and MCP-1</li> </ul>                                                                                                                                                                                                                                                        |

|                         |  |                                                                                                                                              |                                                                    |                                                                   |                                                                                                                                                                                                                  |                                                                                                                                                                        |
|-------------------------|--|----------------------------------------------------------------------------------------------------------------------------------------------|--------------------------------------------------------------------|-------------------------------------------------------------------|------------------------------------------------------------------------------------------------------------------------------------------------------------------------------------------------------------------|------------------------------------------------------------------------------------------------------------------------------------------------------------------------|
|                         |  | <ul style="list-style-type: none"> <li>• CD8<sup>+</sup> T cells-elimination of the infected cells</li> </ul>                                |                                                                    |                                                                   | <p>pro-inflammatory cytokines via NF-kB pathway.</p> <ul style="list-style-type: none"> <li>• Cytotoxic CD8<sup>+</sup> T cells - infiltrate to the infected area and eliminate viral infected cells.</li> </ul> | <ul style="list-style-type: none"> <li>• Memory T cells</li> <li>• B cells activation- IgM and IgG production<sup>9</sup></li> </ul>                                   |
| Humoral immune response |  | <ul style="list-style-type: none"> <li>• Activation of B cells by CD4<sup>+</sup> T cells - memory and antibodies secreting cells</li> </ul> | <ul style="list-style-type: none"> <li>• Viral proteins</li> </ul> | <ul style="list-style-type: none"> <li>• Cell membrane</li> </ul> | <ul style="list-style-type: none"> <li>• Increase in Type 1 IFN, result in B cell activation</li> <li>• Germinal centre reaction</li> </ul>                                                                      | <ul style="list-style-type: none"> <li>• Memory B cells</li> <li>• Antibody secreting cells</li> <li>• IgM, IgG and IgA antibody production<sup>10,11</sup></li> </ul> |

**Supplementary Table 2. Protein similarities (expressed as % identity) between SARS-CoV-2 and other Betacoronaviruses.**

| <b>SARS-CoV-2</b> | <b>Orf1ab</b> | <b>S</b> | <b>ORF3a</b> | <b>E</b> | <b>M</b> | <b>ORF6</b> | <b>ORF7a</b> | <b>ORF8</b> | <b>N</b> | <b>ORF10</b> |
|-------------------|---------------|----------|--------------|----------|----------|-------------|--------------|-------------|----------|--------------|
| <b>Bat-SL-CoV</b> | 95%           | 80%      | 91%          | 100%     | 98%      | 93%         | 88%          | 94%         | 94%      | -            |
| <b>SARS-CoV</b>   | 86%           | 76%      | 72%          | 94%      | 90%      | 68%         | 85%          | 40%         | 90%      | -            |
| <b>MERS-CoV</b>   | 50%           | 35%      | -            | 36%      | 42%      | -           | -            | -           | 48%      | -            |

*ORF - Open reading frame; S – Spike protein; E- Envelope protein; M – Membrane; N- Nucleocapsid proteins; SARS - Severe Acute Respiratory Syndrome; MERS - Middle East Respiratory Syndrome.*

**Supplementary Table 3. Sequences of SARS-CoV B and T cell epitopes that mapped to SARS-CoV-2.**

| Protein   | B cell Epitope SARS-CoV                                 | B cell Epitope SARS-CoV-2                              | T cell Epitope SARS-CoV | T cell Epitope SARS-CoV-2 | MHC Allele     | Identity (%) | REF   |
|-----------|---------------------------------------------------------|--------------------------------------------------------|-------------------------|---------------------------|----------------|--------------|-------|
| N         |                                                         |                                                        | ALNTPKDHI               | ALNTPKDHI                 | HLA-A*02:01    | 100          | 12,13 |
|           |                                                         |                                                        | LALLLDRL                | LALLLDRL                  |                | 100          |       |
|           |                                                         |                                                        | LLLDRLNQL               | LLLDRLNQL                 |                | 100          |       |
|           |                                                         |                                                        | RLNQLESKV               | RLNQLESKM                 |                | 89           |       |
|           |                                                         |                                                        | GETALALLLL              | GDAALALLLL                | HLA-B*40:01    | 80           |       |
|           | KHIDAYKTFPPTPKKDK<br>KKKTDEAQPLPQRQKKQ<br>PTVTLLPAADMDD | NKHIDAYKTFPPTPKKDK<br>KKKTDEAQPLPQRQKKQPT<br>VTLLPAADM |                         |                           |                | 100          |       |
|           | NNAATVLQLPQGTTLPK<br>GFYA                               | NNNAATVLQLPQGTTLPKGF                                   |                         |                           |                | 95           |       |
| S         |                                                         |                                                        | FIAGLIAIV               | FIAGLIAIV                 | HLA-A*02:01    | 100          | 12,13 |
|           |                                                         |                                                        | NLNESLIDL               | NLNESLIDL                 |                | 100          |       |
|           |                                                         |                                                        | ALNTLVKQL               | ALNTLVKQL                 |                | 100          |       |
|           |                                                         |                                                        | RLNEVAKNL               | RLNEVAKNL                 |                | 100          |       |
| VLNDILSRL | VLNDILSRL                                               | 100                                                    |                         |                           |                |              |       |
|           | KSFEIDKGIYQTSNFRVV<br>QLIRAAEIRASA NLAATK               | KSFTVEKGIYQTSNFRVQ<br>QLIRAAEIRASA NLAATK              |                         |                           | HLA-DRB1*04:01 | 78           |       |
|           | DAVDCSQNPLAELKCSV<br>KSFEIDKGIYQTSNF                    | DAVDCALDPLSETKCTLKSF<br>TVEKGIYQTSN                    |                         |                           |                | 100          |       |
|           |                                                         |                                                        |                         |                           |                | 69           | 12-15 |

*N – Nucleocapsid Protein; S – Spike Protein; Major Histocompatibility Complex (MHC); REF - References*

## Supplementary Tables 4

Supplementary Tables 4a. COVID-19 candidate vaccines currently undergoing preclinical development. Adapted and modified from<sup>16-22</sup>.

| TECHNOLOGY                                           | COMPANY                                                           | OTHER PLATFORM CANDIDATES                       |
|------------------------------------------------------|-------------------------------------------------------------------|-------------------------------------------------|
| <b><i>DNA-based approaches</i></b>                   |                                                                   |                                                 |
| Linear DNA vaccine                                   | TakisApplied DNA Sciences, Evvivax                                |                                                 |
| DNA vaccine                                          | BioNet Asia                                                       |                                                 |
| DNA vaccine                                          | University of Waterloo                                            |                                                 |
| DNA vaccine                                          | Entos Pharmaceuticals                                             |                                                 |
| bacTRL-Spike                                         | Symvivo                                                           |                                                 |
| DNA plasmid vaccine                                  | Osaka University, AnGes, Takara Bio                               |                                                 |
| DNA plasmid vaccine                                  | Zydus Cadila                                                      |                                                 |
| Plasmid DNA, Needle-Free Delivery                    | Immunomic Therapeutics, Inc./EpiVax, Inc./PharmaJet, Inc.         | SARS                                            |
| DNA with electroporation                             | Karolinska Institute, Cobra Biologics<br>(OPENCORONA Project)     |                                                 |
| <b><i>Live attenuated virus-based approaches</i></b> |                                                                   |                                                 |
| Codon deoptimized live attenuated vaccines           | Indian Immunologicals Ltd, Griffith University                    |                                                 |
| Codon deoptimized live attenuated vaccines           | Codagenix/Serum, Institute of India                               | HAV, influenza, Zika,<br>FMD, SIV, RSV,<br>DENV |
| <b><i>Inactivated virus-based approaches</i></b>     |                                                                   |                                                 |
| Inactivated + CpG 1018                               | Sinovac, Dynavax                                                  |                                                 |
| Inactivated + CpG 1018                               | Valneva, Dynavax                                                  |                                                 |
| Inactivated                                          | Institute of Medical Biology, Chinese Academy of Medical Sciences |                                                 |
| Inactivated                                          | Osaka University, BIKEN NIBIOHN                                   |                                                 |
| <b><i>RNA-delivery based approaches</i></b>          |                                                                   |                                                 |
| LNP (encapsulated mRNA cocktail encoding VLP)        | Fudan University, Shanghai JiaoTong University, RNACure Biopharma |                                                 |
| LNP-mRNA                                             | Translate Bio, Sanofi Pasteur                                     |                                                 |
| LNP (encapsulated mRNA encoding RBD)                 | Fudan University, Shanghai JiaoTong University, RNACure Biopharma |                                                 |
| LNP-encapsulated mRNA                                | University of Tokyo/Daiichi-Sankyo                                | MERS                                            |
| mRNA candidates                                      | RNAimmune, Inc.                                                   |                                                 |
| mRNA                                                 | FBRI SRC VB VECTOR, Rospotrebnadzor Koltsovo                      |                                                 |
| sRNA in an intranasal delivery system                | eTheRNA                                                           |                                                 |

|                                                                     |                                                           |                                                      |
|---------------------------------------------------------------------|-----------------------------------------------------------|------------------------------------------------------|
| mRNA                                                                | Greenlight Biosciences                                    |                                                      |
| mRNA STARR® vaccine                                                 | Arcturus, Duke-NUS                                        | Multiple candidates                                  |
| Self-amplifying RNA                                                 | Imperial College London                                   | Ebola, Lassa, MARV, influenza A subtype H7N9, RABV   |
| mRNA                                                                | CureVac                                                   | RABV, Lassa, YFV, MERS, influenza A, Zika, DENV, HPV |
| Liposome-encapsulated mRNA                                          | BIOCAD                                                    |                                                      |
| Replicating defective SARS-CoV-2 derived RNA                        | Centro Nacional Biotecnología (CNB-CSIC), Spain           |                                                      |
| <b>VLP-based approaches</b>                                         |                                                           |                                                      |
| Plant-derived VLP                                                   | Medicago Inc.                                             | Influenza, Rotavirus, NORV, West Nile virus, cancer  |
| ADDomer™ multiepitope display                                       | Imophoron Ltd and Bristol, University's Max Planck Centre |                                                      |
| Virus-like particle, based on RBD displayed on virus-like particles | Saiba GmbH                                                |                                                      |
| VLP                                                                 | OSIVAX                                                    |                                                      |
| ADDomer™ multiepitope display                                       | Imophoron Ltd, Bristol University's Max Planck Centre     |                                                      |
| eVLP                                                                | ARTED Biotechnology                                       | Malaria                                              |

*DENV - Dengue virus; FMD – Foot-and-mouth disease virus; HAV – Hepatitis A; HPV - Human papillomavirus; LNP – Lipid nanoparticles; MARV – Marburg virus; MERS - Middle East Respiratory Syndrome; NORV – Norovirus; RABV - Rabies lyssavirus; RSV - Respiratory syncytial virus; SARS - Severe acute respiratory syndrome; SIV - Simian immunodeficiency virus; YFV – Yellow fever*



**Supplementary Table 4b. COVID-19 protein-based vaccine candidates currently undergoing preclinical development.** Adapted and modified from<sup>16-22</sup>.

| TECHNOLOGY                                                              | COMPANY                                               | OTHER PLATFORM CANDIDATES |
|-------------------------------------------------------------------------|-------------------------------------------------------|---------------------------|
| <b><i>Protein-based approaches</i></b>                                  |                                                       |                           |
| MVA encoded VLP                                                         | GeoVax/BravoVax                                       | Lassa, Ebola, MARV, HIV   |
| Recombinant vaccine based on Influenza A virus (intranasal)             | FBRI SRC VB VECTOR, Rospotrebnadzor, Koltsovo         | Influenza                 |
| VSV-S                                                                   | University of Western Ontario                         | HIV, MERS                 |
| VSV vector                                                              | FBRI SRC VB VECTOR, Rospotrebnadzor, Koltsovo         |                           |
| M2-deficient single replication (M2SR) influenza vector                 | UW–Madison, FluGen Bharat Biotech                     | Influenza                 |
| Replication defective Simian Adenovirus (GRAd) encoding SARS-CoV-2 S    | ReiThera, LEUKOCARE Univercells                       |                           |
| Oral Ad5 S                                                              | Stabilitech Biopharma Ltd                             | Zika, VZV, HSV-2, NORV    |
| Adenovirus-based + HLA-matched peptides                                 | Valo Therapeutics Ltd                                 |                           |
| Dendritic cell-based vaccine                                            | University of Manitoba                                |                           |
| Parainfluenza virus 5 (PIV5)-based vaccine expressing the spike protein | University of Georgia, University of Iowa             | MERS                      |
| Recombinant deactivated rabies virus containing S1                      | Bharat Biotech, Thomas Jefferson University           |                           |
| Peptide                                                                 | FBRI SRC VB VECTOR, Rospotrebnadzor Koltsovo          | Ebola                     |
| Subunit                                                                 | FBRI SRC VB VECTOR, Rospotrebnadzor Koltsovo          |                           |
| Subunit protein, plant produced                                         | iBio, CC-Pharming                                     |                           |
| Nanoparticle vaccine                                                    | LakePharma, Inc.                                      |                           |
| Recombinant spike protein with Advax™ adjuvant                          | Vaxine Pty Ltd                                        |                           |
| Bacterial extracellular vesicle (BEV)-based mucosal vaccine             | Quadram Institute Biosciences                         | Influenza A, plague       |
| Spike (S)-based vaccine                                                 | University of Alberta                                 |                           |
| Recombinant S1-Fc fusion protein                                        | AnyGo Technology                                      |                           |
| Recombinant protein                                                     | Yisheng Biopharma                                     |                           |
| Recombinant S protein in IC-BEVS                                        | Vabiotech                                             |                           |
| Orally delivered, heat stable subunit                                   | Applied Biotechnology Institute                       |                           |
| S-2P protein + CpG 1018                                                 | Medigen Vaccine Biologics Corporation, NIAID, Dynavax |                           |
| Ad26 (alone or with MHA-BN® boost)                                      | Janssen Pharmaceutical Companies                      | Ebola, HIV, RSV           |

|                                                                                       |                                                                              |                                                                                  |
|---------------------------------------------------------------------------------------|------------------------------------------------------------------------------|----------------------------------------------------------------------------------|
| Oral vaccine based on recombinant chimeric proteins                                   | MIGAL Research Institute                                                     | Avian coronavirus Infectious, Bronchitis Virus (IBV)                             |
| Ad5 S (GREVAX™ platform)                                                              | Greffex                                                                      | MERS                                                                             |
| Oral vaccine based on VAAST™ platform                                                 | Vaxart, Emergent BioSolutions                                                | Influenza, CHIKV, Lassa, NORV, Ebola, RVF, HBV, VEE                              |
| Horsepox vector expressing S protein TNX-1800                                         | Tonix Pharma, Southern Research                                              | Smallpox, monkeypox                                                              |
| Live viral vectored vaccine based on attenuated influenza virus backbone (intranasal) | BiOCAD and IEM                                                               |                                                                                  |
| Influenza vector expressing RBD                                                       | University of Hong Kong                                                      |                                                                                  |
| VSV vector expressing S protein                                                       | IAVI, Batavia                                                                | Ebola, MARV, Lassa                                                               |
| MVA-S encoded                                                                         | DZIF- German Center for Infection Research                                   | Several                                                                          |
| MVA expressing structural proteins                                                    | Centro Nacional Biotecnología (CNB-CSIC), Spain                              | HIV, HCV, chikungunya, Ebola, Zika, malaria, leishmania                          |
| Capsid-like Particle                                                                  | AdaptVac (PREVENT-nCoV consortium)                                           |                                                                                  |
| Drosophila S" insect cell expression system VLP                                       | ExpreS2ion                                                                   |                                                                                  |
| S protein                                                                             | WRAIR/USAMRIID                                                               |                                                                                  |
| COVID-19 S-Trimer - Native like Trimeric subunit Spike Protein vaccine                | Clover Biopharmaceuticals Inc., GalxoSmithKline (GSK), Dynavax               | HIV, REV, influenza                                                              |
| Adenovirus-based NasoVax expressing SARS2-CoV spike protein                           | Altimmune                                                                    | Influenza                                                                        |
| Peptide antigens formulated in lipid nanoparticle formulation                         | IMV Inc                                                                      |                                                                                  |
| Peptide                                                                               | Vaxil Bio                                                                    |                                                                                  |
| Peptide                                                                               | Flow Pharma Inc                                                              | Ebola, Marburg, HIV, Zika, Influenza, HPV, therapeutic vaccine, BreastCA vaccine |
| S protein                                                                             | AJ Vaccines                                                                  |                                                                                  |
| Ii-Key peptide                                                                        | Generex, EpiVax                                                              | Influenza, HIV, SARS-CoV                                                         |
| S protein + Adjuvant                                                                  | National Institute of Infectious Disease, Japan                              | Influenza                                                                        |
| VLP recombinant protein + Adjuvant                                                    | Osaka University, BIKEN, National Institutes of Biomedical Innovation, Japan |                                                                                  |
| S protein (baculovirus production)                                                    | Sanofi Pasteur                                                               | Influenza, SARS-CoV                                                              |
| Microneedle arrays S1 subunit                                                         | University of Pittsburgh                                                     | MERS                                                                             |
| VLP (recombinant protein nanoparticle + Matrix M)                                     | Novavax                                                                      | RSV, CCHF, HPV, VZV, Ebola                                                       |

|                                                                            |                                                                       |                           |
|----------------------------------------------------------------------------|-----------------------------------------------------------------------|---------------------------|
| gp-96 backbone                                                             | Heat Biologics, University of Miami                                   | NSCLC, HIV, malaria, Zika |
| Molecular clamp stabilized Spike protein + AS03 Adjuvant System            | University of Queensland, GSK, Dynavax                                | Nipah, influenza, Lassa   |
| S1 or RBD protein                                                          | Baylor College of Medicine                                            | SARS                      |
| Adjuvanted microsphere peptide                                             | VIDO-InterVac, University of Saskatchewan                             |                           |
| Adjuvanted protein subunit (RBD)                                           | Biological E Ltd                                                      |                           |
| Recombinant protein, nanoparticles (based on S protein and other epitopes) | Saint-Petersburg scientific research institute of vaccines and serums |                           |
| COVID-19 XWG-03 truncated S proteins                                       | Innovax/Xiamen, Univ./GSK                                             | HPV                       |
| Synthetic Long Peptide Vaccine candidate for S and M proteins              | OncoGen                                                               |                           |

*CCHF - Crimean-Congo haemorrhagic fever; CHIKV - Chikungunya virus; DENV - Dengue virus; FMD – Foot-and-mouth disease virus; HAV – Hepatitis A; HBV – Hepatitis B; HCV – Hepatitis C; HIV - Human Immunodeficiency Virus; HPV - Human papillomavirus; LNP – Lipid nanoparticles; MARV – Marburg virus; MVA - Modified vaccinia virus Ankara; MERS - Middle East Respiratory Syndrome; NORV – Norovirus; NSCLC - Non-small-cell lung carcinoma; RABV - Rabies lyssavirus; REV - Reticuloendotheliosis virus; RSV - Respiratory syncytial virus; RVF - Rift Valley fever; SARS - Severe acute respiratory syndrome; VEE - Venezuelan equine encephalitis virus; VLP – Virus-like particle; VSV - Vesicular stomatitis virus; VZV - Varicella zoster virus;*

## Supplementary Tables 5

**Supplementary Table 5a. Preclinical immune modulator approaches currently undergoing against SARS-CoV-2 virus.** Adapted and modified from<sup>16-22</sup>

| Treatment name                    | Details/Status                                                                                                                                                                                       | Company                                                                                                            |
|-----------------------------------|------------------------------------------------------------------------------------------------------------------------------------------------------------------------------------------------------|--------------------------------------------------------------------------------------------------------------------|
| Rintatolimod (Ampligen)           | Mismatched double stranded polymer of RNA (dsRNA) approved for chronic fatigue syndrome. Discovery for coronavirus (CoV) in February 2020                                                            | Aim Immunotech Inc., GP Pharma SA, Goethe University Frankfurt, National Institute of Infectious Diseases in Japan |
| AT-100                            | Recombinant human surfactant protein D (rhSP-D) that reduces inflammation and infection and modulates lung immune response across a range of respiratory diseases.                                   | Airway Therapeutics Inc., National Institute of Allergy and Infectious Diseases (NIAID)                            |
| BPI-002                           | Small molecule as a potent T cell co-stimulator, alone or combined with a vaccine.                                                                                                                   | BeyondSpring                                                                                                       |
| LEAPS                             | Peptide epitope delivery technology, T-cell modulation. Preclinical reduction of morbidity and mortality against H1N1.                                                                               | CEL-SCI Corp.                                                                                                      |
| Niagen (nicotinamide riboside)    | Trigger innate immunity. Preclinical demonstration that COVID-19 causes nicotinamide adenine dinucleotide (NAD) reduction.                                                                           | Chromadex Corp.                                                                                                    |
| Allocetra                         | Following positive results of Enlivex's phase Ib trial in severe sepsis, it plans to start a clinical trial of Allocetra in COVID-19.                                                                | Enlivex Therapeutics Ltd., Israel Innovation Authority                                                             |
| GTB-3550                          | GT's first Trike therapy candidate and a tri-specific recombinant fusion protein conjugate (anti-CD16, anti-CD33, and a modified form of IL-15). Preclinical evaluation.                             | GT Biopharma Inc. Cytovance Biologics                                                                              |
| 7HP-349                           | Small-molecule integrin activator, as an oral adjuvant. Prophylactic vaccine responses to influenza, Chagas disease and tuberculosis in preclinical models. Clinical trials to start late this year. | Hillis Pharma                                                                                                      |
| Brilacidin                        | Defensin mimetic candidate as a treatment for COVID-19.                                                                                                                                              | Innovation Pharmaceuticals                                                                                         |
| Immune System Regulation(ISR)-500 | In preclinical development for COVID-19.                                                                                                                                                             | ISR Immune System Regulation                                                                                       |
| Microbiome therapeutic            | COVID-19 prevention or as stool-based diagnostic.                                                                                                                                                    | Persephone Biosciences Inc.                                                                                        |
| PRTX-007                          | Oral small molecules that specific activates toll-like receptor 7.                                                                                                                                   | Primmune Therapeutics                                                                                              |
| RTB-101                           | Small-molecule inhibitor of target of rapamycin complex 1 (TORC-1). Clinical data expected by the first quarter of 2021.                                                                             | Restorbio Inc. Adicet Bio Inc.                                                                                     |
| Nanofenretinide (ST-001)          | PST-001-loaded phospholip-based nanoparticle. Preclinical <i>in vitro</i> antiviral activity against MERS, dengue, Zika, West Nile, HIV and HCV.                                                     | Scitech Development LLC                                                                                            |

**Supplementary Table 5b. Preclinical antibody-based approaches currently undergoing against SARS-CoV-2 virus.** Adapted and modified from<sup>16-22</sup>

| <b>Treatment name</b>                                                     | <b>Details/Status</b>                                                                                                | <b>Company</b>                                                                                                          |
|---------------------------------------------------------------------------|----------------------------------------------------------------------------------------------------------------------|-------------------------------------------------------------------------------------------------------------------------|
| IgM and IgA                                                               | Clinical trials planned for first half of next year.                                                                 | Atreca Inc., Beigene Ltd., IGM Biosciences Inc.                                                                         |
| ALT-100                                                                   | Anti-inflammatory action to reduce acute respiratory distress syndrome mortality and ventilator-induced lung injury. | Aqualung Therapeutics Corp.                                                                                             |
|                                                                           | C1 gene expression platform                                                                                          | Dyadic International Inc., The Israel Institute for Biological Research                                                 |
|                                                                           | To block TLR4 and CXCL10                                                                                             | Edesa Biotech Inc. Light Chain Bioscience, unit of Novimmune SA                                                         |
|                                                                           | Prevention of SARS-CoV-2 infection                                                                                   | Harbor Biomed, Mount Sinai Health System                                                                                |
| Human neutralizing antibodies                                             | Discovery of Advanced peripheral blood Hematopoietic Chimera                                                         | Hemogenyx Pharmaceuticals                                                                                               |
|                                                                           | Screening of enriched B-cell libraries from convalescent COVID-19.                                                   | Immuncetye Life Sciences Inc.                                                                                           |
|                                                                           | Polytope against COVID-19.                                                                                           | ImmunoPrecise Antibodies Ltd.                                                                                           |
|                                                                           | Proprietary technology platform                                                                                      | Medicago Inc., Laval University                                                                                         |
| Pritumumab                                                                | Inhibition of virus' binding to target cells. Initiated tests against SARS-CoV-2.                                    | Nascent Biotech Inc.                                                                                                    |
| Variable new antigen receptor domain antibody fragments (VNAR) antibodies | Single-domain VNAR antibodies to the COVID-19 spike protein. Data on rodents and nonhuman primates.                  | Ossianix Inc.                                                                                                           |
|                                                                           | Preclinical and clinical-scale production. On track to begin human testing in June                                   | Regeneron Pharmaceuticals                                                                                               |
| SAB-185                                                                   | Human polyclonal antibody therapeutics, on track for clinical evaluations by early summer.                           | Sab Biotherapeutics, U.S. Department of Defense, CSL Behring LLC                                                        |
| TZLS-501                                                                  | Fully human anti-IL-6 receptor monoclonal antibody.                                                                  | Tiziana Life Sciences                                                                                                   |
| VIR-7831 and VIR-7832                                                     | SARS-CoV-2 binding and neutralization. Phase II clinical trials planned.                                             | Vir Biotechnology Inc., Wuxi Biologics, NIAID, Biogen Inc., Xencor Inc., Glaxosmithkline plc Samsung Biologics Co. Ltd. |

**Supplementary Table 5c. Preclinical antiviral and anti-inflammatory approaches currently undergoing against SARS-CoV-2 virus.** Adapted and modified from<sup>16-22</sup>

| Treatment name                                         | Details/Status                                                                                                                                                     | Company                                                                    |
|--------------------------------------------------------|--------------------------------------------------------------------------------------------------------------------------------------------------------------------|----------------------------------------------------------------------------|
| <b>ANTIVIRAL</b>                                       |                                                                                                                                                                    |                                                                            |
| AB00-1                                                 | Cancer-targeting small molecule. Acts on ACE-2 to inhibit virus entry; acts on NSP15 to prevent virus replication. Clinical trials planned to start.               | Agastiya Biotech LLC                                                       |
| Small molecules                                        | Interfere with 3CL-protease and RNA polymerase. Selected 3 out of 2600 approved small molecule drugs; preclinical evaluation.                                      | Aptorum Group Ltd., Covar Pharmaceuticals Inc. University of Hong Kong     |
| ARMS-I                                                 | Formulation of Cetylpyridinium Chloride (CPC) that kills enveloped viruses, such as COVID-19. Clinical trial involving caregivers.                                 | University Hospitals network in Cleveland                                  |
| Anti-CB1 antagonist analogues                          | Theranostic platform for COVID-19 diagnosis, monitoring and treatment.                                                                                             | Vyripharm Biopharmaceuticals LLC                                           |
| XRx-101                                                | Xanthine oxidase inhibition by a formulation of oxypurinol, to treat acute kidney and lung injury.                                                                 | Xortx Therapeutics Inc. Lonza Pharma & Biotech, a unit of Lonza Group AG   |
| Thin film delivery of cannabigerol (CBG) and quercetin | Initiating an <i>in vitro</i> study.                                                                                                                               | Xphyto Therapeutics Corp. a subsidiary Vektor Pharma TF GmbH               |
| 2-DG                                                   | <i>In vitro</i> reduction of 2-deoxy-D-glucose (2-DG) replication of SARS-CoV-2.                                                                                   | CNS Pharmaceuticals Inc., University of Frankfurt WPD Pharmaceuticals Inc. |
| Broad-spectrum antiviral compounds                     | Protease inhibitors. Already licensed to treat Coronavirus (CoVs) and Norovirus.                                                                                   | Cocrystal Pharma Inc.                                                      |
| Zotatifin                                              | Inhibitor of viral growth. Phase I trial in COVID-19 patients under preparation.                                                                                   | Effector Therapeutics Inc.                                                 |
| Drugs                                                  | Discovery of antiviral drug candidates against COVID-19.                                                                                                           | Enanta Pharmaceuticals Inc.                                                |
| Single-domain antibody                                 | Single-domain antibody with high binding affinity to a unique, conserved conformational epitope present on the receptor-binding domain of SARS-CoV and SARS-CoV-2. | Flanders Institute for Biotechnology (VIB) Ghent University                |
| IMU-838                                                | Selective oral DHODH inhibitor of SARS-CoV-2 replication. Clinical development program ongoing.                                                                    | Immunic Inc.                                                               |
| ACE-MAB fusion protein                                 | Binds to the SARS-CoV-2 spike (S) protein. Clinical development and commercialization.                                                                             | Mabpharm Ltd. Sorrento Therapeutics Inc.                                   |
| Carragelose inhalation therapy                         | To target respiratory viral infections. Tolerance evaluation in healthy volunteers, and proof-of-concept on individuals with viral pneumonia.                      | Marinomed Biotech AG                                                       |

|                                                             |                                                                                                                                                      |                                                                                        |
|-------------------------------------------------------------|------------------------------------------------------------------------------------------------------------------------------------------------------|----------------------------------------------------------------------------------------|
|                                                             | Tri-specific antiviral candidates that target three parts of the viral S protein. Preclinical testing to select a lead candidate.                    | Molecular Partners AG                                                                  |
| Anti-SARS-CoV-2 program                                     | Completed synthesis of nanoviricide candidates.                                                                                                      | NanoViricides                                                                          |
| Nitricil therapeutics                                       | Potential topical oral or nasal candidate for COVID-19, based on NO's ability to inhibit viral replication.                                          | Novan Inc.                                                                             |
| 2X-121                                                      | Small-molecule PARP inhibitor being tested against coronavirus.                                                                                      | Oncology Venture A/S; Pathogen and Microbiome Institute at Northern Arizona University |
| OYA1                                                        | Strong dose-dependent antiviral activity against SARS-CoV-2 <i>in vitro</i> .                                                                        | OyaGen Inc.                                                                            |
| Repositioned drugs                                          | Identified 97 frequently prescribed drugs as potential candidates to be repositioned against COVID-19, that will be tested <i>in vitro</i> .         | Pharnext SA                                                                            |
| RT-001                                                      | Down-regulation of pro-inflammatory fatty acid oxidation against COVID-19-initiated lung damage.                                                     | Retrotope Inc.                                                                         |
| S-protein/ACE2 targeted prophylactic polypeptide (inhalant) | Preclinical data in primates showed good biological activity & safety; planned clinical trials.                                                      | Sichuan Kelun Pharmaceutical Co. Ltd.                                                  |
| Interferon alpha                                            | Nucleic acid test kits and COVID-19 treatment                                                                                                        | Sinopharm Group                                                                        |
| Cynarine or Prexasertib                                     | Protease inhibitor. <i>In vitro</i> data against COVID-19.                                                                                           | Som Biotech SL                                                                         |
| STI-4398                                                    | Neutralization and blocking activity in preventing SARS-CoV-2 virus from infecting ACE2-expressing cells. Starting preclinical studies.              | Sorrento Therapeutics Inc.                                                             |
| Therapeutic nanobody                                        | Nanobodies derived from llama and camels shown to neutralize SARS-CoV-2 infection. Possible development of bispecific or multifunctional antibodies. | Sysvax Inc.                                                                            |
| <b>ANTI-INFLAMMATORY</b>                                    |                                                                                                                                                      |                                                                                        |
| Itanaprazed                                                 | Early intervention treatment of brain COVID-19 infection.                                                                                            | Cerespir Inc.                                                                          |
| Fadraciclib (CYC-065) + Seliciclib (CYC-202 or Roscovitine) | Cyclin-dependent kinase-2/9 inhibitor.                                                                                                               | Cyclacel Pharmaceuticals Inc                                                           |
| Lodonal and IRT-101                                         | Previous data against HIV and H1N1 influenza.                                                                                                        | Immune Therapeutics Inc. Cytocom Inc.                                                  |
| Lamellasome™                                                | Synthetic lipidic mimetics of native human lamellar bodies found in lung tissue that inhibits fibroproliferative changes.                            | Lamellar Biomedical Ltd.                                                               |
| ST-266                                                      | To treat severe inflammatory cytokine storm response in COVID-19 patients.                                                                           | Noveome Biotherapeutics Inc.                                                           |

|                                          |                                                                                                                                                |                                          |
|------------------------------------------|------------------------------------------------------------------------------------------------------------------------------------------------|------------------------------------------|
| Veyonda (idronoxil)                      | Cytokine inhibition, including interleukin-6 (IL-6) involved in cytokine response syndrome                                                     | Noxopharm Co.                            |
| Apabetalone (RVX-208)                    | Inhibitor of bromodomain-containing proteins BRD2 and BRD4.                                                                                    | Resverlogix Corp.                        |
| Lonodelestat (POL-6014)                  | Inhibitor of human neutrophil elastase (hNE), as a therapeutic for COVID-19-related acute respiratory distress syndrome.                       | Santhera Pharmaceuticals Holding AG      |
| PPP-003                                  | Synthetic cannabinoid drug effective in preventing or treating inflammatory cytokine conditions. Completed preclinical testing against sepsis. | Tetra Bio-Pharma Inc.                    |
| Epaspire                                 | Oral formulation of highly purified eicosapentaenoic acid free fatty acid. The companies have applied to FDA for a trial.                      | The KD Pharma Group SA and SLA Pharma AG |
| <b>ANTIVIRAL &amp; ANTI-INFLAMMATORY</b> |                                                                                                                                                |                                          |
| Neumifil (mCBM40)                        | Carbohydrate binding molecule that reduced the number of SARS-CoV-2 plaques <i>in vitro</i> .                                                  | Pneumagen Ltd.                           |
| ADX-629 and reproxalap                   | Aldehyde inhibitors structurally related to chloroquine and hydroxychloroquine.                                                                | Aldeyra Therapeutics Inc.                |



**Supplementary Table 5d. Preclinical Advanced Therapy Medicinal Products (ATMP) and other approaches currently undergoing against SARS-CoV-2 virus.** Adapted and modified from<sup>16-22</sup>

| Treatment name                                    | Details/Status                                                                                                                                                                                                      | Company                                                               |
|---------------------------------------------------|---------------------------------------------------------------------------------------------------------------------------------------------------------------------------------------------------------------------|-----------------------------------------------------------------------|
| <b>ADVANCED THERAPY MEDICINAL PRODUCTS (ATMP)</b> |                                                                                                                                                                                                                     |                                                                       |
| T-cell therapies                                  | Allogenic, off-the-shelf, virus specific T-cell therapies.                                                                                                                                                          | Allovir Inc., Baylor College of Medicine                              |
| Mesenchymal stem cells (MSC)                      | Safety and efficacy in autoimmune and vascular-related diseases, inflammatory lung conditions, pneumonia and chronic obstructive pulmonary disease.                                                                 | Celltex Therapeutics Corp.                                            |
| Natural Killer (NK) cells                         | The activation of NK cells through the NKp46 receptor aims to destroy the virus-infected cells while the other arm can either block the entry of the virus into epithelial cells or neutralize circulating viruses. | Cytovia Inc., Macromoltek Inc.                                        |
| COVID-HIG and COVI-EIG                            | Manufactured from human and horse plasma.                                                                                                                                                                           | Emergent BioSolutions Inc.                                            |
| Cannabidiol-loaded exosomes                       | Administered by inhalation, the technology targets both central nervous system indications and COVID-19.                                                                                                            | Innocan Pharma Corp., Ramot at Tel Aviv University                    |
| Immunoglobulin                                    | Plasma-derived antibodies from donors recovered from virus.                                                                                                                                                         | Kamada Ltd., Biopharma Inc.                                           |
| Antibody recruiting molecule (ARM)/NK therapy     | ARM NK cell combination therapy for COVID-19. The NK cells are expected to move into the clinic for COVID-19 in the second half of this year.                                                                       | Kleo Pharmaceuticals Inc., Green Cross Labcell                        |
| TAK-888 hyperimmune globulin                      | Anti-SARS-CoV-2 polyclonal hyperimmune globulin derived from convalescent COVID-19 patients.                                                                                                                        | Takeda Pharmaceutical, Behring LLC, Biotest AG, LFB SA, Octapharma AG |
| Allorx stem cells                                 | Investigational New Drug (IND) application filed                                                                                                                                                                    | Vitro Diagnostics Inc.                                                |
| MesenCure                                         | Activated mesenchymal cells (MSCs) isolated from the adipose tissue of healthy donors. Preliminary data show significantly increase of blood lymphocyte counts.                                                     | Wize Pharma Inc.; Bonus Biogroup Ltd.                                 |
| <b>OTHER</b>                                      |                                                                                                                                                                                                                     |                                                                       |
| Precision-driven treatment                        | Nanobody-based technology. Cytological experiments ongoing.                                                                                                                                                         | Beroni Group, Tianjin University                                      |
| BXT-25                                            | Galectin inhibitor to treat end-stage COVID-19 patients. Human trials to start shortly.                                                                                                                             | BioXyTran Inc.                                                        |
| VIR-2703 (ALN-COV)                                | RNAi therapies. Accelerated IND filing application at the end of 2020.                                                                                                                                              | Alnylam Pharmaceuticals, Vir Biotechnology                            |
| SARS-CoV-2 targeting recombinant methioninase     | Degrades the amino acid methionine in SARS-CoV-2 and infected cells. COVID-19 prevention or treatment.                                                                                                              | Anticancer Inc.                                                       |
| Trans sodium crocetinate                          | FDA pre-IND submission                                                                                                                                                                                              | Diffusion Pharmaceuticals Inc. University of Virginia                 |

|                                              |                                                                                                                                                                                                                                                        |                                                                                                  |
|----------------------------------------------|--------------------------------------------------------------------------------------------------------------------------------------------------------------------------------------------------------------------------------------------------------|--------------------------------------------------------------------------------------------------|
| LB-1148                                      | Broad-spectrum serine protease inhibitor of digestive proteases. Developed to reduce recovery times and shorten hospital lengths of stay.                                                                                                              | Leading Biosciences Inc.                                                                         |
| INOmax®                                      | Nitric oxide (iNO) as a supportive measure in treating of COVID-19.                                                                                                                                                                                    | Mallinckrodt                                                                                     |
| Prototype powders                            | Dry powder formulation using Technosphere® technology to treat acute respiratory distress syndrome. Development of prototype powders.                                                                                                                  | Mannkind Corp., Immix Biopharma Inc.                                                             |
| 2-deoxy-D-glucose ester-type prodrug WP-1122 | IND submitted.                                                                                                                                                                                                                                         | Moleculin Biotech Inc. University of Texas Medical Branch at Galveston, Imquest Biosciences Inc. |
| KTH-222                                      | KTH-222 regulates cell growth via inhibition of the mitogen-activated protein kinase (MAPK) pathway. To be used alone or in combination with antiviral drugs, in cancer patients infected with COVID-19 or in undiagnosed but symptomatic patients.    | Oncology Pharma Inc., Kalos Therapeutics Inc.                                                    |
| Cenchaquine                                  | Pre-registration for hypovolemic shock and hemodynamic stability, tissue oxygenation, as well as reduction of pulmonary edema, acute respiratory distress syndrome, multiple organ dysfunction score and decrease mortality in patients with COVID-19. | Pharmazz Inc.                                                                                    |
| Upamostat (RHB-107)                          | Protease inhibitor, alone or in combination with hydroxychloroquine. Preclinical ongoing.                                                                                                                                                              | RedHill Biopharma, Link Health Group                                                             |
| Lipocurc                                     | Intravenous formulation of liposomal curcumin.                                                                                                                                                                                                         | Signpath Pharma Inc.                                                                             |
| RNAi therapeutics                            | RNAi-based prophylactics and therapeutics for COVID-19 severe acute respiratory infection.                                                                                                                                                             | Sirnaomics                                                                                       |
| Niclosamide                                  | Optimized salt form of niclosamide as a treatment of COVID-19. <i>In vitro</i> studies showed that it is 25 times more potent than chloroquine and more than 40 times more potent remdesivir.                                                          | Union Therapeutics A/S, Institute Pasteur Korea                                                  |
| COVID-19 therapies                           | 3D bioprinting technology to create human lung tissue to test potential COVID-19 therapies as a "clinical trial in a dish"                                                                                                                             | Viscient Biosciences Inc.                                                                        |
| VBI-S                                        | Phospholipid nanoparticles to redistribute NO. Improved blood pressure and oxygenation of septic shock patients.                                                                                                                                       | Vivacelle Bio Inc.                                                                               |
| KL4 surfactant                               | Positive effects in various models of severe lung injury and clinical effect in respiratory distress syndrome in premature infants                                                                                                                     | Windtree Therapeutics Inc.                                                                       |

## Supplementary Tables 6

**Supplementary Table 6a. Examples of immune-mediated approaches in clinical development against COVID-19.**

| TREATMENT TYPE   | TREATMENT                               | OBJECTIVE          | MECHANISM OF ACTION                                                         | IDENTIFIER                                                                                     | STATUS                 | PHASE   |
|------------------|-----------------------------------------|--------------------|-----------------------------------------------------------------------------|------------------------------------------------------------------------------------------------|------------------------|---------|
| Immune modulator | Baricitinib                             | COVID-19 Patients  | Immune modulator<br>Immunosuppressive<br>JAK1\JAK2 inhibitor                | NCT04320277<br>(Hospital of Prato)                                                             | Not yet recruiting     | III     |
|                  |                                         |                    |                                                                             | NCT04362943<br>(Complejo Hospitalario Universitario de Albacete, Spain)                        | Recruiting             |         |
|                  |                                         |                    |                                                                             | NCT04340232<br>(University of Colorado, Denver)                                                | Not yet recruiting     | II, III |
|                  | CD24Fc                                  |                    | Immune modulator<br>Anti-inflammatory                                       | NCT04317040<br>(OncoImmune, Inc.)                                                              | Recruiting             | III     |
| Vaccine          | Modified antigen presenting cells (APC) | COVID-19 patients  | LV-SMNP-DC vaccine and antigen-specific CTL                                 | NCT04276896<br>(Shenzhen Geno-Immune Medical Institute)                                        | Recruiting             | I/II    |
|                  |                                         |                    | Pathogen-specific aAPC vaccine                                              | NCT04299724<br>(Lung-Ji Chang, Shenzhen Geno-Immune Medical Institute)                         | Recruiting             | I       |
|                  | Non-replicating viral vector            | Healthy volunteers | Ad5-nCov - Recombinant Novel Coronavirus Vaccine (Adenovirus Type 5 Vector) | NCT04313127<br>(CanSino Biologics Inc./ Beijing Institute of Biotechnology)                    | Active, not recruiting | I       |
|                  |                                         |                    |                                                                             | NCT04398147<br>(CanSino Biologics Inc./ Beijing Institute of Biotechnology))                   | Not yet recruiting     | I/II    |
|                  |                                         |                    |                                                                             | NCT04341389<br>(Insitute of Biotechnology, Academy of Military Medical Sciences, PLA of China) | Active, not recruiting | II      |

|  |                   |                                              |                                                                                                                                                                                           |                        |             |
|--|-------------------|----------------------------------------------|-------------------------------------------------------------------------------------------------------------------------------------------------------------------------------------------|------------------------|-------------|
|  |                   | ChAdOx1 nCoV-19 vaccine                      | NCT04324606<br>(University of Oxford/AstraZeneca/Serum Institute of India)                                                                                                                | Active, not recruiting | I/II        |
|  | Inactivated virus | Inactivated SARS-CoV-2 + aluminium           | NCT04352608<br>(Sinovac Biotech Co., Ltd.)                                                                                                                                                | Recruiting             | I/II        |
|  |                   | Inactivated SARS-CoV-2 + aluminium           | NCT04383574<br>(Sinovac Biotech Co., Ltd.)                                                                                                                                                | Not yet recruiting     | I/II        |
|  |                   | Inactivated SARS-CoV-2 (Vero cells)          | ChiCTR2000031809<br>(Wuhan Institute of Biological Products Co., Ltd.)                                                                                                                    | Not yet recruiting     | I/II        |
|  | RNA-based vaccine | BNT162a1                                     | EudraCT 2020-001038-36<br>(BioNTech RNA Pharmaceuticals GmbH/Fosun Pharma/Pfizer)                                                                                                         | Ongoing                | I/II        |
|  |                   | BNT162a1<br>BNT162b1<br>BNT162b2<br>BNT162c2 | NCT04380701<br>NCT04368728<br>(BioNTech RNA Pharmaceuticals GmbH/Fosun Pharma/Pfizer)                                                                                                     | Recruiting             | I/II        |
|  |                   | mRNA-1273                                    | NCT04283461<br>(ModernaTX, Inc./National Institute of Allergy and Infectious Diseases (NIAID))<br>NCT04405076<br>(ModernaTX, Inc./Biomedical Advanced Research and Development Authority) | Recruiting             | I<br><br>II |
|  | DNA-based vaccine | INO-4800                                     | NCT04336410<br>(Inovio Pharmaceuticals)                                                                                                                                                   | Recruiting             | I           |
|  |                   | bacTRL-Spike                                 | NCT04334980<br>(Symvivo Corporation)                                                                                                                                                      | Not yet recruiting     | I           |

|                    |                                                           |                                               |                                                                                                                          |                                                                       |                    |      |
|--------------------|-----------------------------------------------------------|-----------------------------------------------|--------------------------------------------------------------------------------------------------------------------------|-----------------------------------------------------------------------|--------------------|------|
|                    | Protein subunit nanoparticle vaccine                      |                                               | SARS-CoV-2 rS                                                                                                            | NCT04368988 (Novavax)                                                 | Recruiting         | I/II |
|                    | Recombinant SARS-CoV-2 Trimeric S protein subunit vaccine |                                               | SCB-2019                                                                                                                 | NCT04405908 (Clover Biopharmaceuticals AUS Pty Ltd)                   | Not yet recruiting | I    |
|                    | Dendritic cell (DC) vaccine                               | Healthcare providers and first responders     | AV-COVID-19                                                                                                              | NCT04386252 (Aivita Biomedical, Inc.)                                 | Not yet recruiting | I/II |
| Immune suppressant | Thalidomide                                               | Moderate New Coronavirus (COVID-19) Pneumonia | Immune modulator<br>Anti-inflammatory<br>Anti-fibrosis                                                                   | NCT04273529 (First Affiliated Hospital of Wenzhou Medical University) | Not yet recruiting | II   |
|                    | Thalidomide + Low-dose Hormones                           |                                               |                                                                                                                          | NCT04273581 (First Affiliated Hospital of Wenzhou Medical University) | Not yet recruiting | II   |
|                    | Fingolimod                                                |                                               | Anti-inflammatory<br>Sequesters lymphocytes in lymph nodes.<br>Down regulator of sphingosine 1-phosphate (S1P) receptor. | NCT04280588 (First Affiliated Hospital of Fujian Medical University)  | Recruiting         | II   |

**Supplementary Table 6b. Examples of antimalaria and antiviral repurposed drugs in clinical development against COVID-19.**

| TREATMENT TYPE/<br>ACTION                                                                                                    | TREATMENT                                         | OBJECTIVE                                                   | IDENTIFIER                                                                  | STATUS                 | PHASE                       |
|------------------------------------------------------------------------------------------------------------------------------|---------------------------------------------------|-------------------------------------------------------------|-----------------------------------------------------------------------------|------------------------|-----------------------------|
| <b>Antimalaria/</b><br>Anti-inflammatory                                                                                     | Hydroxychloroquine sulfate                        | COVID-19 patients                                           | NCT04315896 (Sanofi)                                                        | Recruiting             | III                         |
|                                                                                                                              |                                                   |                                                             | NCT04353271 (William Richards, University of South Alabama)                 | Active, not recruiting | II/III                      |
|                                                                                                                              |                                                   | Treating healthcare personnel exposed to COVID-19 patients. | NCT04315896 (National Institute of Respiratory Diseases)                    | Recruiting             | III                         |
|                                                                                                                              |                                                   |                                                             | NCT04333225 (Baylor Research Institute)                                     | Active, not recruiting | II                          |
| <b>Antiviral/</b><br>RNA-polymerase inhibitor                                                                                | Remdesivir                                        | COVID-19 patients with mild-to-moderate, or severe disease  | NCT04292899 (Gilead Sciences Inc.)<br>NCT04292730 (Gilead Sciences Inc.)    | Recruiting             | III                         |
|                                                                                                                              |                                                   |                                                             | NCT04252664 (Capital Medical University)                                    | Suspended              |                             |
|                                                                                                                              |                                                   |                                                             | NCT04257656 (China-Japan Friendship Hospital)                               | Terminated             |                             |
|                                                                                                                              |                                                   |                                                             | NCT04280705 (National Institute of Allergy and Infectious Diseases (NIAID)) | Recruiting             | II, III                     |
|                                                                                                                              |                                                   |                                                             | NCT04323761 (Gilead Sciences Inc.)                                          | Available              | Treatment IND/Protocol      |
|                                                                                                                              |                                                   |                                                             | NCT04302766 (U.S. Army Medical Research and Development Command)            | Available              | Treatment IND/Protocol      |
| <b>Antiviral/</b><br>RNA-polymerase inhibitor + guanosine (ribonucleic) analogue to prevent RNA synthesis + immune modulator | Lopinavir/ritonavir + Ribavirin + IFN- $\beta$ 1B | COVID-19 patients with mild-to-moderate, or severe disease  | NCT04276688 (The University of Hong Kong)                                   | Completed              | II                          |
| <b>Non-specific antiviral/</b><br>Immune modulator                                                                           | IFN- $\alpha$ 2 $\beta$                           |                                                             | NCT04293887 (Tongji Hospital)                                               | Not yet recruiting     | I                           |
| <b>Antiviral + Antimalaria/</b><br>Anti-inflammatory + RNA-polymerase inhibitor                                              | Remdesivir + Hydroxychloroquine sulfate           | COVID-19 patients with mild-to-moderate, or severe disease  | NCT04321616 (Oslo University Hospital)                                      | Recruiting             | Norwegian Solidarity II/III |

|                                                                                                                                                                     |                                                                                   |                                                                      |                                                                                         |            |     |
|---------------------------------------------------------------------------------------------------------------------------------------------------------------------|-----------------------------------------------------------------------------------|----------------------------------------------------------------------|-----------------------------------------------------------------------------------------|------------|-----|
|                                                                                                                                                                     |                                                                                   |                                                                      |                                                                                         |            |     |
| <b>Antiviral/<br/>Anti-inflammatory + RNA-<br/>polymerase inhibitor +<br/>protease inhibitor</b>                                                                    | Remdesivir+<br>Hydroxychloroquine<br>sulfate+<br>Lopinavir/ritonavir              | COVID-19 patients<br>with mild-to-<br>moderate, or severe<br>disease | NCT04330690<br>(AbbVie Apotex Inc.)                                                     | Recruiting | II  |
|                                                                                                                                                                     | Remdesivir+<br>Hydroxychloroquine<br>sulfate+<br>Lopinavir/ritonavir +<br>IFN-β1A | COVID-19 patients<br>with mild-to-<br>moderate, or severe<br>disease | NCT04315948<br>(Institut National de la Santé Et de la<br>Recherche Médicale, France)   | Recruiting | III |
| <b>Antiviral + Antimalaria +<br/>Immune modulator/<br/>Anti-inflammatory +<br/>protease inhibitor +<br/>tyrosine kinase inhibitor<br/>or janus kinase inhibitor</b> | Hydroxychloroquine<br>+ Lopinavir/ritonavir<br>or Imatinib or<br>baricitinib      | COVID-19 patients<br>with pneumonia                                  | NCT04346147<br>(Hospital Universitario de<br>Fuenlabrada)                               | Recruiting | II  |
| <b>Antiviral+ Monoclonal<br/>antibodies/<br/>Anti-inflammatory +<br/>immune modulator</b>                                                                           | Favipiravir +<br>Tocilizumab                                                      | Treating COVID-19<br>positive patients.                              | NCT04310228<br>(Peking University First Hospital)                                       | Recruiting | N/A |
| <b>Non-specific anti-<br/>inflammatory</b>                                                                                                                          | Corticosteroids                                                                   |                                                                      | NCT04273321<br>(Beijing Chao Yang Hospital)                                             | Completed  | N/A |
|                                                                                                                                                                     |                                                                                   |                                                                      | NCT04344288<br>(Hospices Civils de Lyon)                                                | Recruiting | II  |
|                                                                                                                                                                     |                                                                                   |                                                                      | NCT04355247<br>(Hospital Auxilio Mutuo Cancer Center<br>San Juan, Puerto Rico)          | Recruiting | II  |
|                                                                                                                                                                     |                                                                                   |                                                                      | NCT04355637<br>(Groupe Hospitalier Pitie Salpetriere,<br>Paris, France)                 | Recruiting | IV  |
|                                                                                                                                                                     |                                                                                   |                                                                      | NCT04344730<br>(Assistance Publique - Hôpitaux de<br>Paris)                             | Recruiting | NA  |
|                                                                                                                                                                     |                                                                                   |                                                                      | NCT04348305<br>(Aarhus University Hospital - Dept of<br>Intensive care Aarhus, Denmark) | Recruiting | III |

**Supplementary Table 6c. Examples of monoclonal antibody-based approaches in clinical development against COVID-19.**

| TREATMENT                                                | OBJECTIVE                                  | MECHANISM OF ACTION                                           | IDENTIFIER                                              | STATUS                 | PHASE                                                               |                                                       |                    |     |
|----------------------------------------------------------|--------------------------------------------|---------------------------------------------------------------|---------------------------------------------------------|------------------------|---------------------------------------------------------------------|-------------------------------------------------------|--------------------|-----|
| Tocilizumab                                              | Severe COVID-19 pneumonia                  | Anti-inflammatory<br>Anti-IL-6 antibody<br>Anti-IL-1 antibody | NCT04317092<br>(National Cancer Institute, Naples)      | Recruiting             | II                                                                  |                                                       |                    |     |
|                                                          |                                            |                                                               | NCT04306705<br>(Tongji Hospital)                        | Recruiting             | Retrospective                                                       |                                                       |                    |     |
|                                                          |                                            |                                                               | NCT04320615<br>(Actemra by Hoffmann-La Roche)           | Recruiting             | III                                                                 |                                                       |                    |     |
|                                                          |                                            |                                                               | NCT04330638<br>(University Hospital Ghent)              | Recruiting             | IV                                                                  |                                                       |                    |     |
|                                                          |                                            |                                                               | NCT04322773<br>(Frederiksberg University Hospital)      | Recruiting             | II                                                                  |                                                       |                    |     |
|                                                          |                                            |                                                               | NCT04315480<br>(Università Politecnica delle Marche)    | Active, not recruiting | II                                                                  |                                                       |                    |     |
|                                                          |                                            |                                                               | NCT04345445<br>(University of Malaya)                   | Not yet recruiting     | III                                                                 |                                                       |                    |     |
|                                                          |                                            |                                                               | NCT04331795<br>(University of Chicago)                  | Recruiting             | II                                                                  |                                                       |                    |     |
|                                                          |                                            |                                                               | NCT04377750<br>(Hadassah Medical Organization)          | Recruiting             | IV                                                                  |                                                       |                    |     |
|                                                          |                                            |                                                               | NCT04335071<br>(University Hospital Inselspital, Berne) | Recruiting             | II                                                                  |                                                       |                    |     |
|                                                          |                                            |                                                               | NCT04370834<br>(National Cancer Institute (NCI))        | Not yet recruiting     | II                                                                  |                                                       |                    |     |
|                                                          |                                            |                                                               | PD-1 blocking antibody+ standard treatment              |                        | Immune modulators<br>Induces T cell response                        | NCT04268537<br>(Southeast University, China)          | Not yet recruiting | II  |
|                                                          |                                            |                                                               | Bevacizumab                                             |                        | Anti- angiogenic<br>Anti-VEGF antibody<br>Reducing pulmonary oedema | NCT04305106<br>(Qilu Hospital of Shandong University) | Recruiting         | N/A |
| NCT04275414<br>(Qilu Hospital of Shandong University)    | Recruiting                                 | II, III                                                       |                                                         |                        |                                                                     |                                                       |                    |     |
| NCT04344782<br>(Assistance Publique - Hôpitaux de Paris) | Not yet recruiting                         | II                                                            |                                                         |                        |                                                                     |                                                       |                    |     |
| Eculizumab                                               | Reducing immune response related damage in | Anti-inflammatory, inhibiting complement activation.          | NCT04288713<br>(Hudson Medical)                         | Available              | N/A                                                                 |                                                       |                    |     |
|                                                          |                                            |                                                               | NCT04355494                                             | Available              | NA                                                                  |                                                       |                    |     |



|            |                                                                              |                                                                                              |                                                                                       |                        |         |
|------------|------------------------------------------------------------------------------|----------------------------------------------------------------------------------------------|---------------------------------------------------------------------------------------|------------------------|---------|
|            | COVID-19 infected patients                                                   | Anti-Complement protein C5                                                                   | (Alexion Pharmaceuticals)<br>NCT04346797<br>(Assistance Publique - Hôpitaux de Paris) | Recruiting             | II      |
| Sarilumab  | Severe COVID-19 infection                                                    | Anti-inflammatory Anti-IL-6 antibody                                                         | NCT04315298<br>(Kevzara by Regeneron Pharmaceuticals & Sanofi)                        | Recruiting             | II, III |
|            |                                                                              |                                                                                              | NCT04359901<br>(Boston Healthcare System United States)                               | Suspended              | I, II   |
|            |                                                                              |                                                                                              | NCT04357808<br>(Hospital Universitario de la Princesa Madrid, Spain)                  | Recruiting             | II      |
|            |                                                                              |                                                                                              | NCT04357860<br>(Maimónides Biomedical Research Institute of Córdoba)                  | Not yet recruiting     | II      |
|            |                                                                              |                                                                                              | NCT04327388<br>(Sanofi)                                                               | Recruiting             | II/II   |
|            |                                                                              |                                                                                              | NCT04324073<br>(Assistance Publique - Hôpitaux de Paris)                              | Active, not recruiting | II/III  |
| Meplazumab | Add-on therapy for COVID-19 infected patients<br>Blocking host cell invasion | Anti-CD147<br>Prevents SARS-CoV-2 spike protein from binding to CD147                        | NCT04275245<br>(Tang-Du Hospital)                                                     | Recruiting             | I, II   |
| Leronlimab | COVID-19 patients with mild-to-moderate respiratory complications            | Anti-CCR5 IgG4 mAb                                                                           | NCT04343651<br>(CytoDyn, Inc.)                                                        | Recruiting             | II      |
|            | COVID-19 patients with severe or critical disease                            |                                                                                              | NCT04347239<br>(CytoDyn, Inc.)                                                        | Recruiting             | II      |
| LY-CoV555  | Hospitalised COVID-19 patients                                               | SARS-CoV-2 spike protein-targeted preventive antibody LY3819253 for prevention and treatment | NCT04411628<br>(Eli Lilly and Company/ AbCellera Biologics Inc.)                      | Recruiting             | I       |

**Supplementary Table 6d. Examples of Advanced Therapy Medicinal Products (ATMP) in clinical development against COVID-19.**

| TREATMENT                                           | OBJECTIVE                                    | MECHANISM OF ACTION                                                           | IDENTIFIER                                                                                                     | STATUS             | PHASE   |
|-----------------------------------------------------|----------------------------------------------|-------------------------------------------------------------------------------|----------------------------------------------------------------------------------------------------------------|--------------------|---------|
| NestCell® Mesenchymal Stem Cell                     | Severe COVID-19 pneumonia                    | Anti-inflammatory<br>Immune modulation<br>Tissue regeneration<br>Cell-therapy | NCT04315987<br>(Azidus Brasil)                                                                                 | Not yet recruiting | I       |
| Dental Pulp Mesenchymal Stem Cells                  |                                              |                                                                               | NCT04302519<br>(CAR-T (Shanghai) Biotechnology Co., Ltd.)                                                      | Not yet recruiting | I       |
| Human Umbilical Cord Derived Mesenchymal stem cells | Severe COVID-19                              |                                                                               | NCT04273646<br>(Wuhan Union Hospital, China)                                                                   | Not yet recruiting | N/A     |
|                                                     |                                              |                                                                               | NCT03042143<br>(Belfast Health and Social Care Trust, United Kingdom)                                          | Recruiting         | I, II   |
|                                                     |                                              |                                                                               | NCT04333368<br>(Hôpital Pitié-Salpêtrière - APHP<br>Hôpital Européen Georges Pompidou - APHP<br>Paris, France) | Recruiting         | I, II   |
|                                                     |                                              |                                                                               | NCT04355728<br>(Union Hospital, Wuhan, China)                                                                  | Recruiting         | I, II   |
|                                                     | Severe COVID-19 pneumonia                    |                                                                               | NCT04269525<br>(Tuohua Biological Technology Co. Ltd.)                                                         | Recruiting         | I       |
| Mesenchymal Stem Cell                               | Severe COVID-19 pneumonia<br>Severe COVID-19 |                                                                               | NCT04252118<br>(Beijing 302 Hospital)                                                                          | Recruiting         | I       |
|                                                     |                                              |                                                                               | NCT04288102<br>(Beijing 302 Hospital)                                                                          | Recruiting         | II, III |
|                                                     | COVID-19 patients                            |                                                                               | NCT04366271<br>(Hospital Infantil Universitario Niño Jesús, Madrid, Spain)                                     | Recruiting         | II      |
|                                                     | Severe COVID-19                              |                                                                               | NCT04377334<br>(University Hospital Tuebingen)                                                                 | Not yet recruiting | II      |
|                                                     |                                              |                                                                               | NCT04366323                                                                                                    | Not yet recruiting | I, II   |

|                                               |                           |                                             |                                                                                    |                    |        |
|-----------------------------------------------|---------------------------|---------------------------------------------|------------------------------------------------------------------------------------|--------------------|--------|
|                                               |                           |                                             | (Andalusian Network for Design and Translation of Advanced Therapies)              |                    |        |
|                                               |                           |                                             | NCT04371393<br>(Annetine Gelijns, Icahn School of Medicine at Mount Sinai)         | Recruiting         | III    |
|                                               |                           |                                             | NCT04366063<br>(Royan Institute)                                                   | Recruiting         | II/III |
|                                               |                           |                                             | NCT04361942<br>(Red de Terapia Celular)                                            | Recruiting         | II     |
|                                               |                           |                                             | NCT04348461<br>(Instituto de Investigación Sanitaria de la Fundación Jiménez Díaz) | Not yet recruiting | II     |
|                                               |                           |                                             | NCT04336254<br>(Renmin Hospital of Wuhan University)                               | Recruiting         | I      |
| Wharton's Jelly-Mesenchymal Stem Cells        | COVID-19 patients         |                                             | NCT04313322<br>(Stem Cells Arabia)                                                 | Recruiting         | I      |
| Stem Cell Educator Therapy                    | Severe COVID-19 pneumonia |                                             | NCT04299152<br>(Tianhe Stem Cell Biotechnologies, Inc.)                            | Not yet recruiting | II     |
| Inhalation of Mesenchymal Stem Cells Exosomes | Severe COVID-19 pneumonia | Anti-inflammatory<br>Tissue repair          | NCT04276987<br>(Ruijin Hospital)                                                   | Not yet recruiting | I      |
| NK Cell Treatment                             | Severe COVID-19 pneumonia | NK immune response against SARS-CoV-2 virus | NCT04280224<br>(Xinxiang medical university)                                       | Recruiting         | I      |
|                                               | COVID-19 patients         |                                             | NCT04324996<br>(Chongqing Sidemu Biotechnology Technology Co., Ltd.)               | Recruiting         | I, II  |
|                                               |                           |                                             | NCT04344548<br>(Fundacion Salud De Los Andes, Bogotá, Colombia)                    | Not yet recruiting | I, II  |
|                                               |                           |                                             | NCT04365101<br>(Lung Biotechnology PBC)                                            | Recruiting         | I, II  |
| Immunoglobulin from Cured Patients            | Severe COVID-19 Pneumonia |                                             | NCT04264858<br>(Wuhan Union Hospital)                                              | Not yet recruiting | N/A    |

|        |                     |                                                            |                                                              |                    |       |
|--------|---------------------|------------------------------------------------------------|--------------------------------------------------------------|--------------------|-------|
|        |                     | Induce specific immune-response against COVID-19 virus     | NCT04345523<br>(Puerta de Hierro University Hospital)        | Recruiting         | II    |
|        |                     |                                                            | NCT04358783<br>(Hospital Universitario Dr. Jose E. Gonzalez) | Recruiting         | II    |
|        |                     |                                                            | NCT04261426<br>(Peking Union Medical College Hospital)       | Not yet recruiting | II/II |
| V-SARS | Healthy individuals | Tableted heat-inactivated plasma from donors with COVID-19 | NCT04380532<br>(Immunitor LLC)                               | Recruiting         | I/II  |

## References

1. Arpaia, N. & Barton, G.M. Toll-like receptors: key players in antiviral immunity. *Curr Opin Virol* **1**, 447-454 (2011).
2. Garcia, M.A., *et al.* Activation of NF- $\kappa$ B pathway by virus infection requires Rb expression. *PLoS One* **4**, e6422 (2009).
3. Durai, P., Batool, M., Shah, M. & Choi, S. Middle East respiratory syndrome coronavirus: transmission, virology and therapeutic targeting to aid in outbreak control. *Exp Mol Med* **47**, e181 (2015).
4. Loo, Y.M. & Gale, M. Immune signaling by RIG-I-like receptors. *Immunity* **34**, 680-692 (2011).
5. Wiese, K.M., Coates, B.M. & Ridge, K.M. The Role of Nucleotide-Binding Oligomerization Domain-Like Receptors in Pulmonary Infection. *Am J Respir Cell Mol Biol* **57**, 151-161 (2017).
6. Monteiro, J.T. & Lepenies, B. Myeloid C-Type Lectin Receptors in Viral Recognition and Antiviral Immunity. *Viruses* **9**, 59 (2017).
7. Bermejo-Jambrina, M., *et al.* C-Type Lectin Receptors in Antiviral Immunity and Viral Escape. *Front Immunol* **9**, 590 (2018).
8. Bedoui, S. & Greyer, M. The role of dendritic cells in immunity against primary herpes simplex virus infections. *Front Microbiol* **5**, 533 (2014).
9. Li, C.K., *et al.* T cell responses to whole SARS coronavirus in humans. *J Immunol* **181**, 5490-5500 (2008).
10. Baumgarth, N. How specific is too specific? B-cell responses to viral infections reveal the importance of breadth over depth. *Immunol Rev* **255**, 82-94 (2013).
11. Lam, J.H. & Baumgarth, N. The Multifaceted B Cell Response to Influenza Virus. *J Immunol* **202**, 351-359 (2019).
12. Ahmed, S.F., Quadeer, A.A. & McKay, M.R. Preliminary Identification of Potential Vaccine Targets for the COVID-19 Coronavirus (SARS-CoV-2) Based on SARS-CoV Immunological Studies. *Viruses* **12**, 254 (2020).
13. Grifoni, A.W., D; Ramirez, SI; Mateus, J; Dan, JM; Moderbacher, CR; Rawlings, SA; Sutherland, A; Premkumar, L; Jadi, RS; Marrama, D; Silva, AM; Frazier, A; Carlin, A; Greebaum, JA; Peters, B; Krammer, F; Smith, DM; Sette, A;. Targets of T cell responses to SARS-CoV-2 coronavirus in humans with COVID-19 disease and unexposed individuals. *Cell* **181**, 1489-1501 (2020).
14. Baruah, V. & Bose, S. Immunoinformatics-aided identification of T cell and B cell epitopes in the surface glycoprotein of 2019-nCoV. *J Med Virol* **92**, 495-500 (2020).
15. Lucchese, G. Epitopes for a 2019-nCoV vaccine. *Cell Mol Immunol* **17**, 539-540 (2020).
16. WHO. DRAFT landscape of COVID-19 candidate vaccines –21 March 2020. (World Health Organization, <https://www.who.int/blueprint/priority-diseases/key-action/novel-coronavirus-landscape-ncov-21march2020.PDF?ua=1>, 2020).
17. Philippidi, A. Catching Up to Coronavirus: Top 60 Treatments in Development. (<https://www.genengnews.com/virology/coronavirus/catching-up-to-coronavirus-top-60-treatments-in-development/>, 2020).
18. Bar-On, Y.E., J; Tsukermnan, P; . The current landscape in Coronavirus Therapy. (<https://academix.bio/covid-19/>, 2020).

19. Idrus, A.I. Biopharma's no-holds-barred fight to find a COVID-19 vaccine: The full list. (<https://www.fiercebiotech.com/biotech/biopharma-s-no-holds-barred-fight-to-find-a-covid-19-vaccine-full-list>, 2020).
20. Garde, D. An updated guide to the coronavirus drugs and vaccines in development. (<https://www.statnews.com/2020/03/19/an-updated-guide-to-the-coronavirus-drugs-and-vaccines-in-development/>, 2020).
21. Walls, A.C., *et al.* Structure, Function, and Antigenicity of the SARS-CoV-2 Spike Glycoprotein. *Cell* **181**, 281-292 (2020).
22. Hodgson, J. The pandemic pipeline. (Nature biotechnology, <https://www.nature.com/articles/d41587-020-00005-z>, 2020).
